# Supplementary material for: Molecular Characterization of Vitellogenin and Its Receptor Genes from Citrus Red Mite, Panonychus citri (McGregor)
Source: MDPI journal article supplement (doi:10.3390/ijms16034759), 2015-03-02
Supplement: s1 [file s1]

## Supplementary Information

|      |                                                                                |      |                                                                           |
|------|--------------------------------------------------------------------------------|------|---------------------------------------------------------------------------|
| 1    | acatgggagctcttctccttggtatcgaaacgattctatcgagagagaaaaaanaataatcgacacatgaagatgcgt | 2699 | ATCGATGAATCTTCAGACGTTGTGATACACGACGGAGCTGAAGAGACGATTAAGTCTAAATCTTCTTCAAA   |
|      | M K I A                                                                        | 880  | I D E I F K T L G I T E R A E E A E A K V K L F F                         |
| 74   | CTTTTGTCTCGAGCTCTCGTAGTCTCAGCTTTGCGTGGTGAATTCACCTCAACCAATCGATTAAAGTT           | 2774 | TTGTTCGAACAACTTCCTCTTCACTTTGGACAACACCACTCGAGCTGCTTACAAACAATCAACCATGTT     |
|      | L F V L G L F V V S A F A G E I Q P Q P I R F K V                              | 905  | L F E Q T S L F T L D K H T I E A A Y K Q F N H V                         |
| 149  | GATCAAAATTCAAAATGATGATACAGTGCCACGTTTAAACGCGATCTCGATCAGGCTCAAGCTTTACTCT         | 2849 | GTTCGAAGTCTCGTGCAAGTATACGCCGAGCATGATACATGGTTCGATCAGTCGATCAGGATCAGTAC      |
| 30   | D Q I Y K Y D Y S G H V L T G L P E S G S S L Y S                              | 930  | V R N F V G Q V N A R T E Y N N W V R F T M P S G Y                       |
| 224  | GGTCATCAATGAAGTCAAGTGTGAATGTCCATCAATCTCCAGTACAGGTGATCAATGAAAGACATC             | 2924 | GTTCGATTTGCCAAGTGCCTGGTTTACCGATTCTCTCAAAACACGACCAAACTGTTGCTCTCGA          |
|      | G H Q L N S T V S I I K S S R S G D N G K F T I                                | 954  | V H V P F S D G L C T L F I V S K Q R F N I V A L R                       |
| 299  | ATCAAGATGGAATGACCAACATGCTTTGGGTCAATCTCAGAGAGTAACAGCTGTCAGAGAGCAAGCTTTC         | 2999 | CTCGAAGGACCAACATCAACCGGATATCCAGCTTGAAGTCACTCAGTGAAGTCTCAGTGAAGTCTTGTGCCAA |
| 80   | I K M E L T N I V L G H L L E V N A V E K A T F                                | 980  | L E A E A T T C A A K P D T T L K S V S E A C T A T L P V Q               |
| 374  | ATCAAGACGATCTTAAACAAAGATGCTGATGTTTACGCTTCCCGTCAATTACTTCTGATGAGATACAC           | 3074 | CTTTACATCACTTCAATCAATGCTGCTCTGCTTTCCACAGGAATACAGAAAACTTGTGCTACTCACTC      |
| 105  | I K D D L K Q K V R D V L A L L P V Q T T F N E D T                            | 1005 | L Y T T S S M S V S G F Q Q G I K N N F G A Y S L                         |
| 449  | GATCCTTTGAATGATGATGATCAAAAATCTGATGCCCTTGTGCGATTAACTCAAGAACTCAATCTGAT           | 3149 | AAGAAGTCAATGTCACGTTCCCGTTAAGGTTTATTCACTTCAGGCGCGCTACCGAGTTTGGACCTAC       |
| 130  | E S F E W I E V Q K S D A P W S V N I K K S I I                                | 3234 | K K F N V H V P V K V S F N F E A A T R V L T A C                         |
| 524  | TTGCTCCAATTGACATTTGTGTAAAGAGCTGACAGAGTGCAATGATGTCATCAATCTGGTCTTCAG             | 1020 | GTTCGACCAACCTTTCAGATTAAGTCTGACGATCTTCCAGCTTCCAGCTGCTTCTGTGTACTGATCAT      |
| 155  | L L Q L N I V G K N A R S A N D V D Q S G L L K                                | 1055 | V E P T L D T K V L T S T N T N R A F L A G N Y I                         |
| 589  | GATATGCACTTTCTAAAGTTTAAACGTTTGGTGTCCATGAATCAACATCAGGCTGAATGTGAACCAAC           | 3299 | GGTCTCCCGCCACGAAGTTCATACAGGAAGTGTCTCATGATACATGTCGCCAGCTTCAGAGCAAC         |
|      | D M Q L S N G L T S F G V H E S T I K G E C E T                                | 1080 | G L P A N S E S P I T K K V L I E S H V P A F K T N                       |
| 674  | TACCAAAATGCTCAGCGCGTATCAGCAAAAGTTCGATGATGCTTCTCGTGCTGATTAATCTCAATCTTAC         | 3374 | CCAGCATCCCATCAGAGAAATGGCATGACATGAACTTCTTCCGAATCAAGCAAGCTGCTTCTTAC         |
| 205  | Y Q I V T A A D P T K V R D A L G D A D K F H F T                              | 3740 | P R L P S R E L G M D I E L S F R T E H P W F L N                         |
| 749  | GTCTCAACGACCCCAAGTTGACACTGTGCTACGAGCAACTATTCCTACCAATTTGGATGCGAAGTGT            | 3449 | GTTCGAAGATCCCAACGAAGGCTTCCCAACTGTGATCTCGGAATACGCTGAGATGACGAATCAACTCT      |
| 230  | V I K T R N F D N C V Y E P S F A S H N W D R G T                              | 1130 | V E K I P T K G P T T W I L E K E A N E N F E A T                         |
| 824  | TGCGTTGAATCTGCAAAAGTTTGTCTGCTTCAACCCATTAAGATGACGATTGAACAACATCTTCCAAT           | 3524 | GATCGCGTTTAACTCTCGACGCAACAAACAAACCCATCAGCTGAGTTCGCGGTTTATTGACTCAACTC      |
| 255  | C V E Y E C K R F A A S T H I K M D D L N K H L P                              | 1155 | D A A L T L R A N K Q N P S A G V A G S F D Y N F                         |
| 899  | CCGATGAAGCTGAACCTTATGTCATGTCAAGAGAACTCAACGATGTGACCAATCAACATCTCGA               | 3599 | GCTTTCGCGGTGTATACAGAACTTAAACATGTGTAAGACACACCATGTCGACGACATCATCTCAAG        |
| 280  | P D E T E T S C S C D P K E T Q P V D Q Y S T I R                              | 1180 | A F A G D Y K E L K H S E N H M V H E R S M L K                           |
| 974  | TACAAGTTCACCTTAGCTGTGAAGCCCAATCTTCTGAAAGCGTTAGTAGGGTGAAGATGCTGTGACAC           | 3674 | AAMCTCGCGCCACGAAGATCTCCAGTCCGAAATCACCAGGAGGAGTCCGGAAGATCGCCGAAGAAATGGTC   |
| 55   | Y N V L T D S E A P T I T T E A L G K G K I V D N                              | 1205 | K L G Q E Q T E S L N I T K E E I R K I A E M V                           |
| 1049 | CATGTCACAAAGTGTGTCTACATCAACATCAATCTGTTGTCTGAGCAAACTCAAGCAAAATCTCC              | 3749 | TACAACTCAACCTGGTGTGTCTGACGAAGAGCTCAACTCTTCCAGGAGCATTAACGTGGTCACTCGAAGT    |
| 330  | H G T K F V V Y T H S I V F V S E Q I Q R N I P                                | 1230 | Y N Y P G V L L N R K T P T L T R A I N W S F R T                         |
| 1124 | CTCATCCGAGAGAGCGTATCCGAGTTAGAGTGTACCTTCACTCTTCTCCATCAACGATGTATGATGT            | 3824 | CTTCCAAAGAGAGCGTACCACTACAGCGTACTCTTATCTCATCAATCCCTGACTACCAACTACTG         |
| 355  | L I P E E S V I R V N E L T F L F Y K G M D A                                  | 1255 | L S K E D D G T H Y N A T L I T G S L D Y Q T Y W                         |
| 1199 | CAAGTTACCCAGCCGATTTCCGAGTTTACAACATTTTGTGCCAAATCATCTGAAGCTTGTGTGCGA             | 3899 | GTCAAAATAGTCTCAACCTTGAGCAGCTGAAGTGTCTTCTATGTTTACAGAGTTTTCAAATCGAAGCT      |
| 380  | Q V Y P S H V I P V Y N I L V P K S S E N L V G P                              | 1280 | V K Y V S T L T E R P E G S F Y G L L P R V F Q I E A                     |
| 1274 | ACTGTGCATCTCTTAAACAGTTCGCCAAGCATTTAGGAAGTGCTTCAAGCAAGCTCAATCCAGAGCCGCG         | 3974 | ACATCGCTGACGCTGCTTCCCACTGAATCAATGGGAAGTTCGCCAATGGAACAAATTCATCGAAGAA       |
| 405  | T V D L L N Q V A K T V M E G A S N E A Q S K A A                              | 1305 | N I A R P A L P T E L K W E V P Q L N K F I G K Y                         |
| 1349 | TGTCATCGTTCAAGTTGTCCAAAGTTGGCTCACCTTTCAGCCGAGACATCAACAAATTTACGATGACGA          | 4049 | ATGCTCACTTACCTGGGTGAATCTTGCAGATCTTCCGACGAAGACCAACCTTCTCATCAATGGTTTC       |
| 430  | W Y M V Y Q N L A R L S A D I K Q I Y D D E                                    | 1330 | I A N L T W G E S F E T L A H E D R T I F I N G                           |
| 1424 | GCCGAAATGAGACAGGAGCAATGATCCACACGGAACATCAGTTGTGCGACAGCTTTACTGACGGCTTG           | 4124 | TTACACGATGTTGAGACAGAGTTGTGCGTGAACAAATGAAGGCCAAATCATGTCAGAGCAACATGTTCA     |
| 455  | A R I E D K E R F T T N E H S V R Q L L D L A L                                | 1355 | L H R T V D D Q V V G E Q M K A K S W Y H E Q C S                         |
| 1499 | GTCCAGTGTGTACAGCACTCCGCTGAATGTTCCAAATGTTCTGCGTGAAGAACTCACTTCAGCATGAA           | 4199 | AMGATATCAAGCAAAAGCTTTCATGAGTACGCTTCCCACTTGTGCTGACGAGCAATCATATCTCAAC       |
| 480  | A H V G T K A T A E W F M L V A E K S L S A Y E                                | 1380 | K D I K I O K T F T M S Y A C Q L V A H E Q S Y F N K                     |
| 1574 | GAGCAGAGATCTGTTGAACCATCCACGAACACATACGCTTCATCAGCAACTTCTTGTCCATCATGAAGAG         | 4274 | GTCACTGGTACCGTGAATCTCAAGTCAAACTTAAGCAAAAATGTCGAATCAACCACTCTTCTTACCAAGTA   |
| 505  | E R R F V T E I P R N T Y A P S R T L L A I M K E                              | 1405 | V T G T V E F K S N L N E K L V N S T N L F Y Q V                         |
| 1649 | CAAAATCAAGAGCCGTCGAAACAAAGATGATGACAGCACTTTCAGCTTCTGCTGTACTGACGTAACATCATC       | 4349 | GTCAGTCCCACTTAACTCATCTGGCAGCCTGTGCAACATCTGCTCATACGCT                      |

**Figure S1.** Nucleotide and amino acid sequences of vitellogenin 1 (Vg1) from *Panonychus citri* (*PcVg1*). The ATG start codon and TAA stop codon are in bold, and the signal peptide is underlined with a dashed line. The cleavage signal K/RXXR is indicated by an open box. The GLCG conserved motif is bold and italicized. The polyadenylation signal is underlined with a wavy line.
